# Supplementary material for: Towards a Knowledge-Based Decision Support System for Integrated Control of Woolly Apple Aphid, Eriosoma lanigerum, with Maximal Biological Suppression by the Parasitoid Aphelinus mali
Source: MDPI journal article supplement (doi:10.3390/insects12060479), 2021-05-21
Supplement: s1 [file s1]

Supplementary Materials: The following are available online at [www.mdpi.com/xxx/s1](http://www.mdpi.com/xxx/s1)

Table S1. Model functions, estimated parameters and the AIC values for each model

| Target insect                      | Model characteristics |                                                                                     |
|------------------------------------|-----------------------|-------------------------------------------------------------------------------------|
| <i>A. mali</i>                     | Model name            | Polynomial 5                                                                        |
|                                    | Formula               | $rT \sim a_0 + a_1 * T + a_2 * T^2 + a_3 * T^3 + a_4 * T^4 + a_5 * T^5$             |
|                                    | Estimated parameters  | $a_0 = -2.940e-03 \pm 1.506e-03$                                                    |
|                                    |                       | $a_1 = -1.716e-04 \pm 5.192e-04$                                                    |
|                                    |                       | $a_2 = 4.895e-04 \pm 1.540e-04$                                                     |
|                                    |                       | $a_3 = -5.389e-05 \pm 1.558e-05$                                                    |
|                                    |                       | $a_4 = 2.653e-06 \pm 5.831e-07$                                                     |
| $a_5 = -4.303e-08 \pm 7.281e-09$   |                       |                                                                                     |
| Akaike Information Criterion (AIC) |                       | -194.74                                                                             |
| <i>E. lanigerum</i>                | Model name            | Polynomial 6                                                                        |
|                                    | Formula               | $rT \sim a_0 + a_1 * T + a_2 * T^2 + a_3 * T^3 + a_4 * T^4 + a_5 * T^5 + a_6 * T^6$ |
|                                    | Estimated parameters  | $a_0 = 1.013e-03 \pm 1.132e-03$                                                     |
|                                    |                       | $a_1 = -9.014e-04 \pm 3.583e-04$                                                    |
|                                    |                       | $a_2 = -2.011e-04 \pm 1.486e-04$                                                    |
|                                    |                       | $a_3 = 1.044e-04 \pm 2.662e-05$                                                     |
|                                    |                       | $a_4 = -8.425e-06 \pm 1.819e-06$                                                    |
| $a_5 = 2.731e-07 \pm 5.344e-08$    |                       |                                                                                     |
| $a_6 = -3.209e-09 \pm 5.673e-10$   |                       |                                                                                     |
| Akaike Information Criterion (AIC) |                       | -188.99                                                                             |

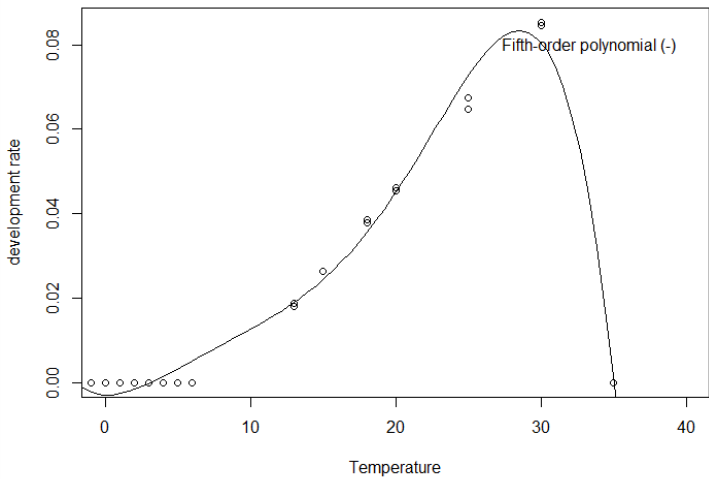

Figure S1. Fitting of the fifth order polynomial function to describe the temperature-dependent development rate of *A. mali*.

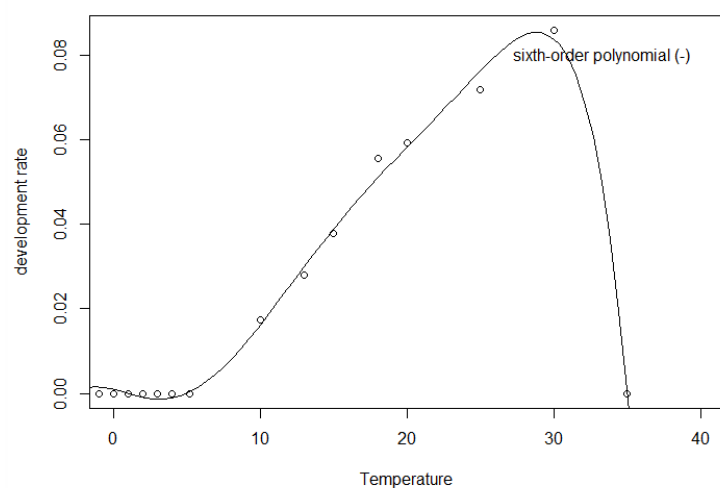

**Figure S2.** Fitting of the sixth order polynomial function to describe the temperature-dependent development rate of *E. lanigerum*.
